# Supplementary material
Source: HighWire-hosted journal article supplement (http://ajnr-stage2.highwire.org/highwire/filestream/52687/field_highwire_adjunct_files/0/15-00108.pdf)
Supplement: 15-00108.pdf [file 15-00108.pdf]

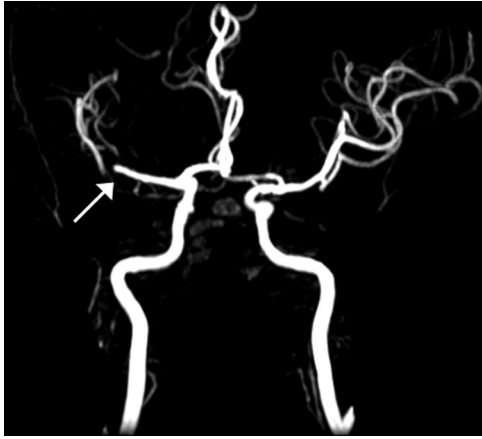

**ON-LINE FIG 1.** TOF-MRA in a same patient as in Fig 2 shows severe stenosis in the right MCA horizontal segment (*arrow*).

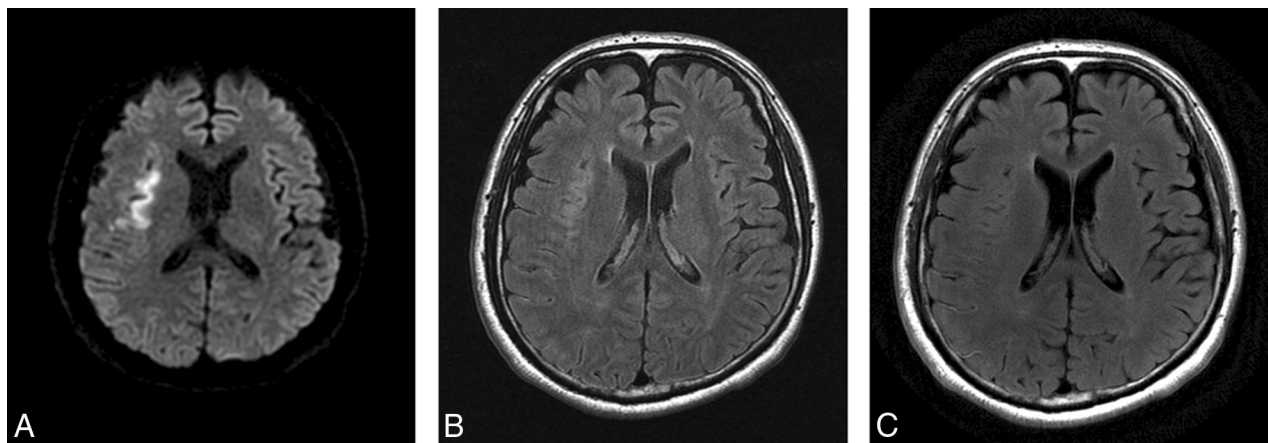

**ON-LINE FIG 2.** Parenchymal lesions on DWI, T2-FLAIR, and T2-PROPELLER-FLAIR. A 64-year-old man with right MCA territory infarction. The time from onset to imaging was 7 hours. Acute infarction in the right insular cortex is well-visualized on DWI (A) and T2-FLAIR (B). However, this lesion is subtle on T2-PROPELLER-FLAIR (C).

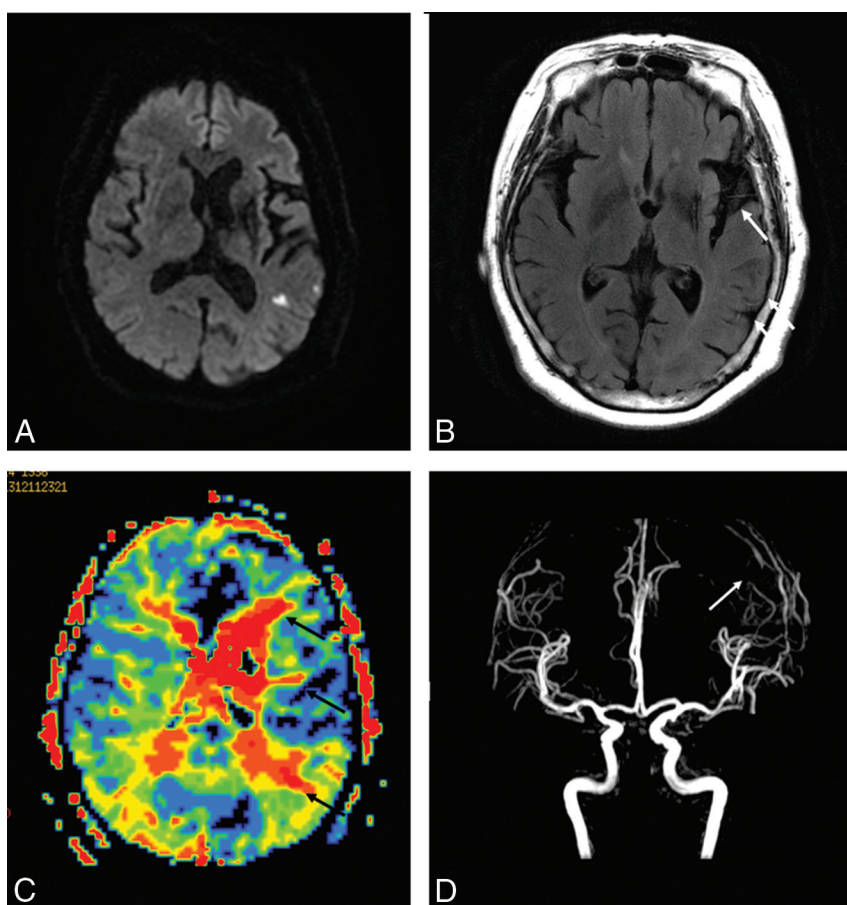

**ON-LINE FIG 3.** An example of true-positive on PROPELLER-T2-FLAIR. Brain MR imaging in a 77-year-old woman with left MCA territory infarction. On DWI (A), acute infarctions are seen in M3. FHV on T2-PROPELLER-FLAIR (B) are seen in the Sylvian fissure and M3 (arrow). On  $T_{max}$  (C), perfusion abnormality is also noted in the left MCA territory. D, At first review, MRA shows no large-artery stenosis, while distal artery stenosis or occlusion is suspected in conjunction with T2-PROPELLER-FLAIR.
